1 **Assessment of knowledge about human papillomavirus vaccination among**  
2 **primary school girls in Arba Minch town, South Ethiopia, 2020.**

3 **An institution-based cross-sectional study**

4 Eshetu Yisihak Ukumo<sup>1\*</sup>, Feleke Gebremeskel<sup>2</sup>, Samuel Abebe<sup>1</sup>, Desta Markos Minanmo<sup>2</sup>,  
5 Gebresilasea Gendisha Ukke<sup>1</sup>

6 <sup>1</sup>Department of Midwifery, College of Medicine and Health Sciences, Arba Minch University,  
7 Arba Minch, Ethiopia

8  
9 <sup>2</sup>School of Public Health, College of Medicine and Health Sciences, Arba Minch University,  
10 Arba Minch, Ethiopia

11

12 \*Corresponding author; Eshetu Yisihak,

13 Email: [eshetuyisihak@gmail.com](mailto:eshetuyisihak@gmail.com)

14

15

16  These authors contributed equally to this work

17

18

19

20

21

22

23

24

25

## 26 **Abstract**

27 **Introduction:** Cervical cancer is the second leading cause of cancer-related mortality  
28 among females in Ethiopia. The knowledge regarding human papillomavirus  
29 vaccination and its acceptability among adolescent girls affects the human  
30 papillomavirus vaccine uptake, however, the status of knowledge of the human  
31 papillomavirus vaccination among adolescent girls in Ethiopia, particularly in this  
32 study area is not well known. Therefore, this study aimed to determine the  
33 knowledge of human papillomavirus vaccination and associated factors among  
34 primary school girls in Arba Minch town, South Ethiopia, 2020.

35 **Methods:** A school-based cross-sectional study in which 516 school girls  
36 participated was conducted on January 24, 2020. The study participants were  
37 selected by a simple random sampling technique. A pre-tested and self-  
38 administered questionnaire was used to collect the data. Data was entered to  
39 Epi\_data version 4.6 and exported to SPSS Version 23 for analysis. The logistic  
40 regression model was used to identify the statistically significant variables for  
41 knowledge of the human papillomavirus vaccination.

42 **Results:** The overall knowledge level of the study participants in this study was  
43 71.7%. Their main information source was social media 41.74% followed by  
44 health care workers 29.69%.

45 **Conclusions:** Nearly three-fourths of the study participants were knowledgeable  
46 about human papillomavirus vaccination. The knowledge about the human  
47 papillomavirus vaccination shows a positive association with age, education level,  
48 and access to information sources, and parents' educational status.

49 **Keywords:** Arbaminch town; cervical cancer; Ethiopia; human papillomavirus  
50 vaccine; girls; knowledge; schools

## 51 **Introduction:**

52  
53 The human papillomavirus (HPV) vaccine is a vaccine used to prevent genital warts, anal  
54 cancer, cervical cancer, vulvar cancer, and vaginal cancer caused by certain types of human  
55 papillomavirus (HPV) [1]. Cervical cancer is a global public health problem accounting for  
56 almost 300,000 deaths annually. Eighty-three of new cases and 85% of related deaths occur in  
57 resource-poor countries [2]. Cervical cancer is the most notable health problem of Sub-Saharan  
58 Africa (SSA). Annually 34.8/100,000 women new cases and 22.5 / 100,000 women deaths were  
59 occurred in this sub-region [2]. In Ethiopia cervical cancer is the second leading cause of cancer  
60 mortality, every year, 7095 women are diagnosed and 4732 are dying from cervical cancer [3-5].

61 Of the totally served patients at the center, women were about 73 %, and cervical cancer is the  
62 most common disease comprising over one-third of all female patients treated in Ethiopia [6].

63

64 The majority of cancers (over 80%) in sub-Saharan Africa (SSA) are detected at a late stage,  
65 predominantly due to lack of information about cervical cancer and a scarcity of prevention  
66 services which in turn are associated with low survival rates after surgery or radiotherapy [7].

67 The primary prevention for cervical cancer is to avoid the transmission of HPV types. Among  
68 those methods, HPV vaccination is the one [7]. Similarly, with WHO, Ethiopia recommends  
69 primary target population; girls aged 9–14 years, for HPV vaccination before becoming sexually  
70 active.

71  
72 Factors that are associated with the knowledge of HPV vaccine include information source [8],  
73 residence [9] family education level [10], age [11], school type, discussion with health care  
74 providers [10], School-based education about HPV vaccine [12], and Discussion about the  
75 vaccine with peer [13].

76 Even if knowledge regarding HPV vaccine among adolescent girls affects HPV vaccine uptake,  
77 knowledge of the HPV vaccine was little known in Ethiopia. Therefore, this study aimed to fill  
78 this information gap by assessing knowledge, and associated factors of HPV vaccine among  
79 primary school girls in Arbaminch town, south Ethiopia. The primary beneficiaries of this study  
80 were adolescent girls because their levels of knowledge towards the HPV vaccine was assessed  
81 and recommended to the concerned bodies. Secondly, the result of this study can work as a  
82 crucial source of information for health program planners and further investigators.

## 83 **MATERIALS AND METHODS,**

### 84 **Study setting,**

85 Arba-Minch town, the capital city of Gamo zone, is 505km from Addis Ababa (capital city of  
86 Ethiopia) and about 280 Km from Hawasa (capital city of southern Ethiopia). There are 1  
87 hospital, 3 health centers, and 11 health posts providing health services. Arbaminch has 4 sub-  
88 cities and 11 kebeles. Arba Minch town has 55 KG schools from which 6 were public, 18 full  
89 primary schools from which 8 were public, 9 secondary and preparatory schools from which 5  
90 were public. A total number of students registered in 2020 in Arbaminch town were grade one up  
91 to twelve 27,512 from which female students are 14,431, grade five up to eight 8,867 from which  
92 female students are 4,758, [14], zonal and city health offices work jointly with schools to deliver  
93 the vaccine in a school-based way after creating awareness by health extension workers and  
94 other concerned bodies [15].

### 95 **Study design,**

96 A school-based cross-sectional study

### 97 **Source population,**

98 All girl students in primary schools of Arba Minch town, South Ethiopia

### 99 **Study population,**

100 All girl students in 6 selected primary schools of Arba Minch town during the data collection  
101 period.

### 102 **Study variables,**

#### 103 **Dependent variable,**

104 Knowledge of HPV vaccine

#### 105 **Independent variables,**

106 Age,

107 Grade level,

108 School type,

109 Educational status of family,

110 Source of information about HPV vaccine

111 School based education about HPV vaccine

## 112 **Operational and term Definitions**

113 **Good knowledge**, Those who answered 50% or more or 4 and above from 7 knowledge  
114 assessing questions [11].

115 **Poor knowledge**, Those who answered below (50% ) from knowledge assessing questions [11].

116 **The human papillomavirus**; is a group of viruses that is extremely common worldwide [16].

117 **The human papillomavirus vaccine**; is a vaccine used to prevent cervical cancer, genital warts,  
118 anal cancers, caused by certain types of human papillomavirus [1]

119

120

## 121 **Eligibility criteria,**

### 122 **Inclusion criteria,**

123 Those girls who were attending a primary school and in grade 5 up to 8

### 124 **Exclusion criteria,**

125 Those girls who were ill at the time of data collection

## 126 **Sample Size Determination,**

127 The sample size was determined by using a single population proportion formula with the  
128 assumption of a 95% confidence level, 5% margin of error, by taking “p” (0.696) from similar  
129 studies conducted among adolescent girls, design effect 1.5 and adding 10% non-response rate.

130 The final sample size was 537.

131 **Sampling technique,**  
132

133 From total primary schools found in the city (in both private and public), 6 primary schools were  
134 selected by simple random sampling without replacement through the lottery method. Then the  
135 calculated sample size was allocated to each school proportionally, then to each grade level again  
136 proportionally, after getting eligible adolescent girls for each grade level from their homeroom  
137 teachers and relisted to prepare sampling frame to that grade level. while preparing the sampling  
138 frame, a section of given students was listed in front of their name to finally get her, then study  
139 units of a given grade level obtained by SRS through lottery method. Finally, selected study units  
140 for given schools were requested to be in one place (to one of the sections at break time) and fill  
141 the questionnaire through the guidance of data collection facilitators and supervisors.

142 **Data collection tool and procedures,**

143 Selected girls were assembled in one place in (one of the sections at break time) selected schools  
144 on the day of the survey. A pre-tested, Semi-structured, translated to Amharic language and self-  
145 administered questionnaire was used. Each girl selected for the survey filled the questionnaire  
146 under close supervision of data collectors and investigators. Data collectors were selected from  
147 teachers of their respective schools. The questionnaire consists of socio-demographic  
148 information and knowledge of the HPV vaccine among adolescent girls of Arbaminch town. The  
149 tool was prepared by English version and translated to Amharic to avoid missing important  
150 information; then it was translated back to English for analysis.

151

152

153

154

155

156

157

158

159

160

161

162

163

164

165

166



167 **Data quality control,**

168 The training was given on clarification of some assessment tools, the aim of the study, time of  
169 data collection, timely collection and reorganization of the collected data from respective  
170 schools, and submission on due time.

171 The questionnaire was pre-tested with 5% of the sample size in Mirab Abaya primary school in  
172 the Gamo zone which is not included in this study. In addition to appropriate recruitment and  
173 training of data collectors, the quality of the data was monitored frequently both in the field and  
174 during data entry. This was done in the field through close supervision of data collectors. All  
175 filled questionnaire was examined for completeness and consistency during data collection.

176

177

178

179

180 **Data Processing and analysis,**

181 Data was entered to Epi data version 4.6 and exported for analysis to SPSS Version 23.

182 Descriptive analysis was made and measures of central tendency were also determined. In

183 scoring knowledge, one point was awarded for every correct answer and zero for incorrect or 'do

184 not know' responses. The total knowledge score was then be converted into percentages and the

185 level of knowledge of the respondents was classified based on their score and of overall 7

186 knowledge questions, study participants who score <50% (i.e. answered correctly  $\leq 3$  questions)

187 were labeled as having poor knowledge and those who answer 4 or above from 7 questions or

188 score 50% and above were labeled as having good knowledge.

189 Logistic regression was applied to see the association between dependent and independent

190 variables. Independent variables, which had an association in bi-variable analysis with p-value

191 <0.25 were entered into the multivariable logistic regression model. Independent variables with

192 p-value<0.05 in the multivariable logistic regression model were considered as statically

193 significant factors for knowledge. The results were presented as odds ratios (OR) with 95%

194 confidence intervals. An odds ratio with corresponding 95% CI was used to quantify the

195 association between a dependent variable and independent variables. The model fitness was

196 checked by using the software application of the Hossmare and Lame show test (>0.05). The

197 results were presented using text, and tables.

198

199

200 **Results,**

201 Out of the 537 samples that were distributed, 516 study participants were interviewed in this  
 202 study, with a response rate of 96.1%. Majorities of the study participants were Gamo in ethnicity  
 203 (71.3%) and protestant Christians in religion (60.5%) (Table 1).

204 **Table 1:** Socio-demographic characteristics of primary school girls in Arba Minch town,  
 205 southern Ethiopia, 2020, (N=516).

| Variables                  | categories          | Frequency (n) | Percent (%) |
|----------------------------|---------------------|---------------|-------------|
| Age in years               | 12_14               | 284           | 55          |
|                            | ≥15                 | 232           | 45          |
| Religion                   | Protestant          | 312           | 60.5        |
|                            | Orthodox            | 148           | 28.7        |
|                            | Catholic            | 20            | 3.9         |
|                            | Muslim              | 17            | 3.3         |
|                            | Others              | 19            | 3.7         |
| Ethnic group               | Gamo                | 368           | 71.3        |
|                            | Gofa                | 46            | 8.9         |
|                            | Amhara              | 33            | 6.4         |
|                            | Oromo               | 23            | 4.5         |
|                            | Wolayta             | 33            | 6.4         |
|                            | Others              | 13            | 2.5         |
| Residence                  | Urban               | 436           | 84.5        |
|                            | Rural               | 80            | 15.5        |
| Grade level                | Grade 5&6           | 219           | 42.4        |
|                            | Grade 7 &8          | 297           | 57.6        |
| School type                | Public              | 470           | 91.1        |
|                            | Private             | 46            | 8.9         |
| Mothers educational status | no education        | 112           | 21.7        |
|                            | primary education   | 115           | 22.3        |
|                            | secondary education | 184           | 35.7        |
|                            | more than secondary | 105           | 20.3        |
| Fathers educational status | no education        | 72            | 14.0        |
|                            | primary education   | 89            | 17.2        |
|                            | secondary education | 107           | 20.7        |
|                            | more than secondary | 248           | 48.1        |

206                    **Knowledge of respondents toward HPV vaccine,**  
207        Three hundred seventy, 71.7% CI 95%(67.6\_75.4) of the study participants were found to have  
208        good knowledge about the HPV vaccine, 69.8% of the study participants knew the targeted age  
209        group and 78.3 knew the number of HPV vaccines to be given for prevention of cervical cancer.  
210        The main source of information was social media (41.74%) followed by health care providers  
211        while giving health information at school (29.69%) (Table2).

212  
213  
214  
215  
216  
217  
218  
219  
220  
221  
222  
223  
224  
225  
226  
227  
228  
229  
230  
231  
232  
233  
234  
235  
236  
237  
238  
239  
240  
241  
242  
243  
244  
245  
246

247 **Table 2:** Knowledge and related responses of primary school girls in Arba Minch town, south  
 248 Ethiopia, 2020, (N=516).

| Variables                                                        | Frequency                               | Percent |                        |
|------------------------------------------------------------------|-----------------------------------------|---------|------------------------|
| Do you know HPV vaccine                                          | Yes                                     | 409     | 79.3                   |
|                                                                  | No                                      | 107     | 20.7                   |
| What is HPV vaccine                                              | Given for prevention of cervical cancer | 310     | 60.1                   |
|                                                                  | Given for prevention of malaria         | 50      | 9.7                    |
|                                                                  | Given for prevention of HIV ADDIS       | 16      | 3.1                    |
|                                                                  | I do not know                           | 140     | 27.1                   |
| An interval that someone take second HPV vaccine                 | 6 month                                 | 314     | 60.9                   |
|                                                                  | 6 year                                  | 62      | 12.0                   |
|                                                                  | 1 month                                 | 26      | 5.0                    |
|                                                                  | 3 month                                 | 114     | 22.1                   |
| HPV vaccines should be taken before sex initiations              | Yes                                     | 292     | 56.6                   |
|                                                                  | No                                      | 224     | 43.4                   |
| Number of HPV vaccine                                            | Twice                                   | 404     | 78.3                   |
|                                                                  | Once                                    | 112     | 21.7                   |
| Possible to have cervical cancer screening after HPV vaccination | Yes                                     | 383     | 74.2                   |
|                                                                  | No                                      | 133     | 25.8                   |
| Age at which someone undergo HPV vaccination                     | 9-14 years                              | 360     | 69.8                   |
|                                                                  | 18-21 years                             | 30      | 5.8                    |
|                                                                  | All ages                                | 27      | 5.2                    |
|                                                                  | I do not know                           | 99      | 19.2                   |
| Obtained information about HPV vaccine from any source           | Yes                                     | 357     | 69.2                   |
|                                                                  | No                                      | 159     | 30.8                   |
| Information source                                               | Social media                            | 149     | 41.74                  |
|                                                                  | Health care workers                     | 106     | 29.69                  |
|                                                                  | Families and friends                    | 102     | 28.57                  |
| In your school, is there any reproductive health related clubs   | Yes                                     | 357     | 69.2                   |
|                                                                  | No                                      | 159     | 30.8                   |
| Knowledge level                                                  | Poor Knowledge                          | 146     | 28.3 CI 95%(24.6_32.4) |
|                                                                  | Good Knowledge                          | 370     | 71.7 CI 95%(67.6_75.4) |

249

250 **Associated factors with knowledge of HPV vaccine,**

251

252 Logistic regression analysis was done to assess an association between the socio-demographic  
253 characteristics of the study participants with their knowledge level towards HPV vaccine showed  
254 that; age, Grade level, familial educational status, and information source, have had a positive  
255 association. (that is those who are >15 years old have close to fourfold more likely having good  
256 knowledge about HPV vaccine as compared to those who are 12\_14 years old, AOR =3.74,  
257 95%CI (2.20\_6.37), P-value <0.001),

258 Those who are in Grade7and 8 close to four-fold more likely of having good knowledge about  
259 HPV vaccine as compared to those who are in Grade 5 and 6, AOR=3.98, 95%CI (2.40\_6.58), P-  
260 value <0.001),

261  
262 Familial educational status (those for whom, mothers educational status of secondary close to  
263 fourteen fold and more than secondary close to twenty twofold and fathers educational status of  
264 more than secondary close to threefold have good knowledge about HPV vaccine than their  
265 counterpart, AOR=13.60, 95%CI (5.69\_32.53) P-value <0.001), 22.27, 95%CI(8.23\_60.30), P-  
266 value<0.001), 2.18, 95%CI(1.09\_4.35), P-value 0.03) respectively,

267  
268 Those who obtained HPV vaccine information have close to nine fold more likely of having  
269 good knowledge about HPV vaccine than those who do not obtain HPV vaccine information  
270 AOR=8.65, 95% CI(3.92\_19.07), P-value <0.001)) (table3). Hosmer and Lemeshow's test value  
271 of this model was 0.131.

272  
273  
274

| Variables | Knowledge of HPV vaccine | COR(95% CI) | AOR(95% CI) |  |
|-----------|--------------------------|-------------|-------------|--|
|-----------|--------------------------|-------------|-------------|--|

|                                                   |                     | Good       | Poor       |                  |                   | P_value  |
|---------------------------------------------------|---------------------|------------|------------|------------------|-------------------|----------|
| Age                                               | 12_14               | 180(34.9%) | 104(20.2%) | 1                | 1                 | 1        |
|                                                   | ≥15                 | 190(36.8%) | 42(8.2%)   | 2.61(1.73_3.95)  | 3.74(2.20_6.37)   | <0.001** |
| School type                                       | Public              | 330(64%)   | 140(27.1%) | 1                | 1                 | 1        |
|                                                   | Private             | 40(7.8%)   | 6(1.2%)    | 2.83(1.17_6.82)  | 1.704(0.6_4.87)   | 0.32     |
| Residence                                         | Rural               | 52(10.1%)  | 28(5.4%)   | 1                | 1                 | 1        |
|                                                   | Urban               | 318(61.6%) | 118(22.9%) | 1.45(0.88_2.41)  | 1.27(0.68_2.39)   | 0.46     |
| Grade level                                       | 5 and 6             | 136(26.4%) | 83(16.1%)  | 1                | 1                 | 1        |
|                                                   | 7and 8              | 234(45.3%) | 63(12.2%)  | 2.27(1.54_3.35)  | 3.98(2.40_6.58)   | <0.001** |
| Mothers' educational status                       | No education        | 64(12.4%)  | 48(9.3%)   | 1                | 1                 | 1        |
|                                                   | Primary             | 58(11.2%)  | 57(11%)    | 0.76(0.45_1.29)  | 0.94(0.50_1.76)   | 0.84     |
|                                                   | Secondary           | 155(30%)   | 29(5.6%)   | 4.01(2.32_6.92)  | 13.60(5.69_32.53) | <0.001** |
|                                                   | More than secondary | 93(18%)    | 12(2.3%)   | 5.81(2.86_11.80) | 22.27(8.23_60.30) | <0.001** |
| Fathers' educational status                       | No education        | 37(7.2%)   | 35(6.8%)   | 1                | 1                 | 1        |
|                                                   | Primary             | 46(8.9%)   | 43(8.3%)   | 1.01(0.54_1.88)  | 0.73(0.35_1.55)   | 0.41     |
|                                                   | Secondary           | 83(16.1%)  | 24(4.7%)   | 3.27(1.71_6.25)  | 1.98(0.90_4.36)   | 0.09     |
|                                                   | More than secondary | 204(39.5%) | 44(8.5%)   | 4.39(2.49_7.72)  | 2.18(1.09_4.35)   | 0.03*    |
| Herd about HPV vaccine from any source            | Yes                 | 260(50.4%) | 97(18.8%)  | 1                | 1                 | 1        |
|                                                   | No                  | 110(21.3%) | 49(9.5%)   | 1.19(0.79_1.80)  | 8.65(3.92_19.07)  | <0.001** |
| Reproductive health related information in school | Yes                 | 254(49.2%) | 103(20%)   | 0.91(0.60_1.39)  | 0.93(0.55_1.57)   | 0.77     |
|                                                   | No                  | 116(22.5%) | 43(8.3%)   | 1                | 1                 | 1        |

275 **Table 1:** Association between socio-demographic factors and knowledge level of HPV vaccine

276 \*= shows an association, \*\* = shows strong association

## 277 **DISCUSSION,**

278 The overall knowledge score of this study was 71.7% CI 95%(67.6\_75.4), which is lower than  
279 the studies conducted in Australia 97.4%[17], Zambia 98.7% [18], and higher than  
280 USA47.5%[19], china 15.7%[13], Taiwan7.49%[20], Spain 67%[12], Grace59.1%[21], and  
281 Turkey 23.2%[22], Nigeria 23%[23], Serbia 14.2%[24] ,Ghana 40%(14), and  
282 Ethiopia(AddisAbaba13% [25], and Jimma 43.8%[11]. These dissimilarities may be due to the  
283 differences in culture and information access, differences in education institutions' structure,  
284 sampling procedures and tools, and the cut-off points to define the level of knowledge.

285 The age of respondents had a positive association with knowledge. Those who are >15 years old  
286 have close to fourfold more likely to have good knowledge about HPV vaccine as compared to  
287 those who are 12\_14 years old, AOR =3.74, 95%CI(2.20\_6.37), P-value <0.001), which is  
288 similar to a study conducted in Greek [21] and Jimma, Ethiopia[11].

289 As the education level of girls increases, knowledge of the HPV vaccine increases. Those who  
290 are in Grade7and 8 have close to four-fold more likely of having good knowledge about HPV  
291 vaccine as compared to those who are in Grade 5 and 6, AOR=3.98, 95%CI (2.40\_6.58), P-value  
292 <0.001), a study conducted in Jimma, southwest, Ethiopia,[11] and Turkey[22] showed a similar  
293 result. The association might be due to the increased level of education that may pave the way  
294 to increased information access, and the level of understanding.

295



296 Familial educational status(those for whom, mothers educational status of secondary close to  
297 fourteen fold and more than secondary close to twenty-two fold and fathers educational status of  
298 more than secondary close to twofold have good knowledge about HPV vaccine than their  
299 counterpart, AOR=13.60, 95%CI (5.69\_32.53)P-value <0.001), 22.27, 95%CI(8.23\_60.30), P-  
300 value<0.001) 2.18, 95%CI(1.09\_4.35)P-value 0.03) respectively, this is similar with a study  
301 conducted in Senegal [26]. It could be because of good communication between parents and their  
302 daughters and that may aware them.

303

304 Information source about HPV vaccine has a statistically significant association with knowledge  
305 of HPV vaccine, that is, those who obtained HPV vaccine information have close to nine-fold  
306 more likely of having good knowledge about HPV vaccine than those who do not obtain HPV  
307 vaccine information AOR=8.65, 95% CI(3.92\_19.07), P-value <0.001) which is similar to a  
308 study conducted in USA [19].

### 309 **Strength of the study,**

310 As the study was conducted in a multidisciplinary way, the quality of the study was  
311 unquestionable. In addition to this, a pretest was conducted and relevance, consistency, and  
312 validity of the tool were checked. It was able to survey a random sample of female students,  
313 thereby increasing the generalizability of the findings to other eligible students. This study  
314 utilized a self-administered questionnaire which increases the likelihood of respondents  
315 answering openly, hence increase internal validity.

316

317 **Limitations of the study,**

318 The limitation of this study was not included girls' parents in the study as they were decision-  
319 makers.

320 **CONCLUSION,**

321 The overall knowledge level of study participants was 71.7%, which is still less than three fourth.  
322 Factors positively associated with knowledge of HPV vaccine were age, Grade level, and  
323 familial educational status, and information source. It is better if health care workers provide  
324 extra information to increase girls' knowledge about the HPV vaccine. It is also better if  
325 education institutions encourage girls' education as the increased level of girls' education is  
326 associated with the increased level of HPV vaccine knowledge.

327 **Data Availability,**

328 The data supporting the conclusions of this study were included in the text.

329 **Funding Statement,**

330 The research was fully funded by Arbaminch University.

331 **ACKNOWLEDGMENTS,**

332 We want to forward our respectful gratitude to the Arbaminch city education bureau for their  
333 cooperation in giving us important information.

334 We also want to forward our uncountable thank to directors and teachers of schools that were  
335 selected for our study as well as data collectors and students who were participated in our study  
336 by filling the questionnaires allocated to them.

337 **Authors' contributions,**

338 Eshetu Yisihak made substantial contributions to the conception and design of this study. Eshetu  
339 Yisihak together with Feleke Gebremeskel made contributions to analyze and interpret the data.  
340 Desta Markos, Gebresilasea Gendisha & Samuel Abebe made contributions by guiding the  
341 collection of data and checking the consistency and completeness of the data. All authors were  
342 responsible for drafting the manuscript.

343 **Conflicts of interest,**

344 Authors have no competing interest

345

346 **Ethical Considerations,**

347 Ethical clearance was obtained from the University of Arba Minch, institutional ethical review  
348 board. Co-operation letter received from Gamo zone education office, and selected schools.  
349 Ascent consent from homeroom teachers of adolescents and informed consent from adolescents  
350 was obtained before the interview was commenced. The ascent was obtained from homeroom  
351 teachers of adolescents through sending ascent requesting letters from the University of Arba  
352 Minch to the schools selected for the study. Confidentiality was maintained by omitting their  
353 name and personal identification.

354

355

356

357

358

## References

- 359  
360
- 361 1. <https://www.cancer.gov/publications/dictionaries/cancer-terms/def/hpv-vaccine>.
  - 362 2. *Release P. Latest world cancer statistics*. 12 December 2013.
  - 363 3. IARC, W., *GLOBOCAN: Estimated Cancer Incidence, Mortality, and Prevalence*  
364 *Worldwide in, 2012*.
  - 365 4. A, R., *Human papillomavirus (HPV) and related cancers in the Global Alliance for*  
366 *vaccines and immunization (GAVI) countries*. November 2012.
  - 367 5. Bruni L B-RL AG AM, S.B., Castellsague X, et al. *HPV and cancer*. March 20 2015.
  - 368 6. Sarah F, C.W., May M, Natabhona M, Florence N and Elizabeth B. *Cervical cancer*  
369 *prevention and treatment research in Africa: a systematic review from a public health*  
370 *perspective*. BMC Women's Health., 2016; **16:29**.
  - 371 7. *Federal Democratic Republic of Ethiopia Ministry of Health ,Guideline for Cervical*  
372 *Cancer Prevention and Control in Ethiopia*, January 2015.
  - 373 8. Brittany L. Rosen, P., CHES®1, et al., *Human Papillomavirus Vaccine Sources of*  
374 *Information and Adolescents' Knowledge and Perceptions*. [sagepub.com/home/gph](https://sagepub.com/home/gph), 2017.  
375 **4: 1–10**.
  - 376 9. Anagnostou, P., V. Aletras, and D. Niakas, *Human papillomavirus knowledge and*  
377 *vaccine acceptability among adolescents in a Greek region*. Public health, 2017. **152**: p.  
378 145-152.
  - 379 10. CDC, *Morbidity and Mortality Weekly Report (MMWR). National, State, and Local Area*  
380 *Vaccination Coverage among Adolescents Aged 13-17 Years --United States 2009. Vol.*  
381 *59*. 2010.

- 382 11. Geneti, H., D. Hailu, and G. Muleta, *Assessment of the Knowledge, Attitude and*  
383 *Acceptability towards Human Papilloma Virus and its Vaccine among Undergraduate*  
384 *Female Medical Students, South-West Ethiopia*. Gynecol Obstet (Sunnyvale), 2016.  
385 **6**(410): p. 2161-0932.1000410.
- 386 12. Pedro Navarro-Illana<sup>1\*</sup>, J.D.-D., Esther Navarro-Illana<sup>1</sup>, José Tuells<sup>4</sup>, Sara Alemán<sup>3</sup> and  
387 Joan Puig-Barberá<sup>3</sup>, “*Knowledge and attitudes of Spanish adolescent girls towards*  
388 *human papillomavirus infection: where to intervene to improve vaccination coverage*”.  
389 BMC Public Health 2014. **14**:490(<http://www.biomedcentral.com/1471-2458/14/490>).
- 390 13. Zhang, X., et al., *Effect of a school-based educational intervention on HPV and HPV*  
391 *vaccine knowledge and willingness to be vaccinated among Chinese adolescents: a multi*  
392 *center intervention follow-up study*. Vaccine, 2020.
- 393 14. *ArbaMich city education office, ArbaMich, Ethiopia*. 2019.
- 394 15. *ArbaMich city and zonal health office, ArbaMich, Ethiopia*. 2019.
- 395 16. WHO, *Human papiloma virus and cervical cancer*. 24 January 2019.
- 396 17. Tung, I.L., D.A. Machalek, and S.M. Garland, *Attitudes, knowledge and factors*  
397 *associated with human papillomavirus (HPV) vaccine uptake in adolescent girls and*  
398 *young women in Victoria, Australia*. PloS one, 2016. **11**(8): p. e0161846.
- 399 18. Arbyn M, X.L., Simoens C, Martin Hirsch PP., *Prophylactic vaccination against human*  
400 *papillomaviruses to prevent cervical cancer and its precursors*. *Cochrane Database of*  
401 *Systematic Reviews*. 2018(5).
- 402 19. Rosen, B.L., et al., *Human Papillomavirus vaccine sources of information and*  
403 *adolescents’ knowledge and perceptions*. Global pediatric health, 2017. **4**: p.  
404 2333794X17743405.

- 405 20. Wang, H.-H. and S.-Y. Wu, *HPV vaccine knowledge and perceived risk of cervical*  
406 *cancer among female college students in Taiwan*. *Asian Pac J Cancer Prev*, 2013. **14**(12):  
407 p. 7371-4.
- 408 21. Donadiki, E.M., et al., *Knowledge of the HPV vaccine and its association with vaccine*  
409 *uptake among female higher-education students in Greece*. *Human vaccines &*  
410 *immunotherapeutics*, 2013. **9**(2): p. 300-305.
- 411 22. Turhan, E., et al., *Awareness and knowledge levels of 18-year-old and older individuals*  
412 *regarding Human Papillomavirus (HPV) and HPV vaccine in Hatay, Turkey*. *Journal of*  
413 *Cancer Education*, 2019. **34**(2): p. 234-241.
- 414 23. \*Ndikom C.M1 and Oboh P.I2. *Perception, acceptance and uptake of human*  
415 *papillomavirus vaccine among female adolescents in selected secondary schools in*  
416 *Ibadan, Nigeria Afr. J. Biomed. Res. , (September, 2017). Vol. 20 ; 237- 244.*
- 417 24. Nataša K. Rančić<sup>1</sup>, Milan B. Golubović<sup>2</sup>, Mirko V. Ilić<sup>3</sup>, Aleksanda S.  
418 Ignjatović<sup>1</sup>, Radomir M. Živadinović<sup>1</sup>, Saša N. Đenić<sup>4</sup>, Stefan D. Momčilović<sup>5</sup>,  
419 Biljana N. Kocić<sup>1</sup>, Zoran G. Milošević<sup>1</sup> and Suzana A. Otašević<sup>1</sup>, *Knowledge about*  
420 *cervical cancer and awareness of human papillomavirus (HPV) and HPV vaccine among*  
421 *female students from Serbia*. August 13, 2020.
- 422 25. Assefa, R., *Girl's Preference for Human Papilloma Virus Vaccination in Secondary*  
423 *Schools in Addis Ababa, Ethiopia, 2017: Discrete Choice Experiment*. 2017, Addis  
424 Ababa University.
- 425 26. Massey, P.M., et al., *Human papillomavirus (HPV) awareness and vaccine receptivity*  
426 *among Senegalese adolescents*. *Tropical Medicine & International Health*, 2017. **22**(1): p.  
427 113-121.

428

429

430

431

432

433

434

435

436

437

438

439

440

441

442
